# Supplementary material
Source: Research Square preprint supplement (doi:10.21203/rs.3.rs-9611368/v1)
Supplement: Supplementary file 1 [file 05ffcc7d5c76c9897620320a.docx]

Supplementary File S1. PRISMA 2020 Checklist for the Systematic Review

| **Section and Topic** | **Item #** | **Checklist item** | **Location where item is reported** |
| --- | --- | --- | --- |
| **TITLE** | | |  |
| Title | 1 | Identify the report as a systematic review. | Title page, 1 |
| **ABSTRACT** | | |  |
| Abstract | 2 | See the PRISMA 2020 for Abstracts checklist. | Abstract section, 2 |
| **INTRODUCTION** | | |  |
| Rationale | 3 | Describe the rationale for the review in the context of existing knowledge. | Introduction- paragraph 1-5 |
| Objectives | 4 | Provide an explicit statement of the objective(s) or question(s) the review addresses. | Introduction, paragraph 5 |
| **METHODS** | | |  |
| Eligibility criteria | 5 | Specify the inclusion and exclusion criteria for the review and how studies were grouped for the syntheses. | Methods-eligibility criteria |
| Information sources | 6 | Specify all databases, registers, websites, organisations, reference lists and other sources searched or consulted to identify studies. Specify the date when each source was last searched or consulted. | Methods → Search strategy (PubMed, Google Scholar, Semantic Scholar; Jan 2000–Dec 2025) |
| Search strategy | 7 | Present the full search strategies for all databases, registers and websites, including any filters and limits used. | Table 1 |
| Selection process | 8 | Specify the methods used to decide whether a study met the inclusion criteria of the review, including how many reviewers screened each record and each report retrieved, whether they worked independently, and if applicable, details of automation tools used in the process. | Methods → Search strategy + Figure 1 |
| Data collection process | 9 | Specify the methods used to collect data from reports, including how many reviewers collected data from each report, whether they worked independently, any processes for obtaining or confirming data from study investigators, and if applicable, details of automation tools used in the process. | Methods-data extraction |
| Data items | 10a | List and define all outcomes for which data were sought. Specify whether all results that were compatible with each outcome domain in each study were sought (e.g. for all measures, time points, analyses), and if not, the methods used to decide which results to collect. | Methods-data extraction |
| 10b | List and define all other variables for which data were sought (e.g. participant and intervention characteristics, funding sources). Describe any assumptions made about any missing or unclear information. | Methods-data extraction |
| Study risk of bias assessment | 11 | Specify the methods used to assess risk of bias in the included studies, including details of the tool(s) used, how many reviewers assessed each study and whether they worked independently, and if applicable, details of automation tools used in the process. | Methods → risk of bias assessment |
| Effect measures | 12 | Specify for each outcome the effect measure(s) (e.g. risk ratio, mean difference) used in the synthesis or presentation of results. | Methods- data synthesis; none |
| Synthesis methods | 13a | Describe the processes used to decide which studies were eligible for each synthesis (e.g. tabulating the study intervention characteristics and comparing against the planned groups for each synthesis (item #5)). | Methods, data synthesis |
| 13b | Describe any methods required to prepare the data for presentation or synthesis, such as handling of missing summary statistics, or data conversions. | Methods – Data Synthesis |
| 13c | Describe any methods used to tabulate or visually display results of individual studies and syntheses. | Methods-data extraction; tables 2-4 |
| 13d | Describe any methods used to synthesize results and provide a rationale for the choice(s). If meta-analysis was performed, describe the model(s), method(s) to identify the presence and extent of statistical heterogeneity, and software package(s) used. | Methods – Data Synthesis |
| 13e | Describe any methods used to explore possible causes of heterogeneity among study results (e.g. subgroup analysis, meta-regression). | Methods, data synthesis; No meta-regression required |
| 13f | Describe any sensitivity analyses conducted to assess robustness of the synthesized results. | Methods, data synthesis; Not conducted |
| Reporting bias assessment | 14 | Describe any methods used to assess risk of bias due to missing results in a synthesis (arising from reporting biases). | Methods, risk of bias assessment |
| Certainty assessment | 15 | Describe any methods used to assess certainty (or confidence) in the body of evidence for an outcome. | Results, certainty of evidence. None conducted |
| **RESULTS** | | |  |
| Study selection | 16a | Describe the results of the search and selection process, from the number of records identified in the search to the number of studies included in the review, ideally using a flow diagram. | Results- study selection; Figure 1 |
| 16b | Cite studies that might appear to meet the inclusion criteria, but which were excluded, and explain why they were excluded. | Results- study selection; Figure 1 |
| Study characteristics | 17 | Cite each included study and present its characteristics. | Results-study characteristics. Table 2 |
| Risk of bias in studies | 18 | Present assessments of risk of bias for each included study. | Methods-risk of bias assessment; Results- risk of bias |
| Results of individual studies | 19 | For all outcomes, present, for each study: (a) summary statistics for each group (where appropriate) and (b) an effect estimate and its precision (e.g. confidence/credible interval), ideally using structured tables or plots. | Tables 2-4 |
| Results of syntheses | 20a | For each synthesis, briefly summarise the characteristics and risk of bias among contributing studies. | Results-risk of bias within studies. Discussion- Methodological Quality and Limitations |
| 20b | Present results of all statistical syntheses conducted. If meta-analysis was done, present for each the summary estimate and its precision (e.g. confidence/credible interval) and measures of statistical heterogeneity. If comparing groups, describe the direction of the effect. | Methods-data synthesis; Results- synthesis of results |
| 20c | Present results of all investigations of possible causes of heterogeneity among study results. | Table 2&3, Discussion - Diagnostic Landscape / Confounders / Geographic Variation |
| 20d | Present results of all sensitivity analyses conducted to assess the robustness of the synthesized results. | Methods-Data synthesis- none conducted |
| Reporting biases | 21 | Present assessments of risk of bias due to missing results (arising from reporting biases) for each synthesis assessed. | Results-reporting bias |
| Certainty of evidence | 22 | Present assessments of certainty (or confidence) in the body of evidence for each outcome assessed. | Results-certainty of evidence. None conducted |
| **DISCUSSION** | | |  |
| Discussion | 23a | Provide a general interpretation of the results in the context of other evidence. | Discussion → Diagnostic Landscape of Vitamin B12 Assessment in SCD  Discussion → Serum Total Vitamin B12 and Homocysteine-Based Assessment  Conclusion |
| 23b | Discuss any limitations of the evidence included in the review. | Discussion → Clinical, Dietary, and Gastrointestinal Confounders  Discussion → Therapeutic and Medication-Related Influences  Discussion → Genetic Influences and Precision Diagnostics  Limitations |
| 23c | Discuss any limitations of the review processes used. | Methods → Data Synthesis  Results → Reporting Bias  Results → Certainty of Evidence  Limitations |
| 23d | Discuss implications of the results for practice, policy, and future research. | Discussion → Implications for Research, ClinicalPractice, andPolicy**.** Recommendations  Conclusion |
| **OTHER INFORMATION** | | |  |
| Registration and protocol | 24a | Provide registration information for the review, including register name and registration number, or state that the review was not registered. | Methods → Search Strategy, Sources and Selection Process; Abstract. |
| 24b | Indicate where the review protocol can be accessed, or state that a protocol was not prepared. | Methods → Search Strategy, Sources and Selection Process. A separate publicly accessible protocol document was not prepared beyond PROSPERO registration. |
| 24c | Describe and explain any amendments to information provided at registration or in the protocol. | Methods → Search Strategy. No substantive amendments were made to the review objectives, |
| Support | 25 | Describe sources of financial or non-financial support for the review, and the role of the funders or sponsors in the review. | Declarations / Funding statement (end of manuscript) |
| Competing interests | 26 | Declare any competing interests of review authors. | Declarations / Competing Interest |
| Availability of data, code and other materials | 27 | Report which of the following are publicly available and where they can be found: template data collection forms; data extracted from included studies; data used for all analyses; analytic code; any other materials used in the review. | Data Availability Statement.  Data collection forms and extracted datasets are available from the corresponding author upon reasonable request. |
