# Supplementary material
Source: Research Square preprint supplement (doi:10.21203/rs.3.rs-9611368/v1)
Supplement: Supplementary file 2 [file 87caae4799cd327b7ffec06f.docx]

**Supplementary Table 1: Database-Specific Search Strategies for Vitamin B12 and Sickle Cell Disease Studies (January 2000–March 2026)**

| **Database** | **Search Strategy** |
| --- | --- |
| **PubMed** | ("Vitamin B12"[MeSH Terms] OR "Vitamin B 12"[MeSH Terms] OR "cobalamin*"[Title/Abstract] OR "adenosylcobalamin*"[Title/Abstract] OR "methylmalonic acid*"[Title/Abstract] OR "holotranscobalamin*"[Title/Abstract] OR "holoTC"[Title/Abstract] OR "vitamin B12"[Title/Abstract] OR "B12"[Title/Abstract])) AND ("Anaemia, Sickle Cell"[MeSH Terms] OR "sickle cell*"[Title/Abstract] OR "haemoglobin S"[Title/Abstract] OR "haemoglobin S"[Title/Abstract] OR "HbS"[Title/Abstract] OR "SCD"[Title/Abstract])) AND ("Vitamin B12 Deficiency"[MeSH Terms] OR "vitamin B12 deficiency*"[Title/Abstract] OR "cobalamin deficiency*"[Title/Abstract] OR "megaloblastic anaemia*"[Title/Abstract] OR "megaloblastic anaemia*"[Title/Abstract] OR "nutritional status"[Title/Abstract])) AND ("2000/01/01"[PDAT] : "2025/12/31"[PDAT]) |
| **Google Scholar** | All in title: ("vitamin B12" OR cobalamin OR adenosylcobalamin OR "methylmalonic acid" OR holotranscobalamin OR "sickle cell" OR "sickle cell disease" OR "haemoglobin S" OR "haemoglobin S" OR "vitamin B12 deficiency" OR "megaloblastic anaemia" OR "nutritional status") 2000..2025 |
| **Semantic Scholar** | (vitamin B12 OR cobalamin OR adenosylcobalamin OR "methylmalonic acid" OR holotranscobalamin) AND ("sickle cell disease" OR "sickle cell anaemia" OR "haemoglobin S" OR "haemoglobin S") AND ("vitamin B12 deficiency" OR "megaloblastic anaemia" OR "nutritional status") |
